# Supplementary material for: POET (v0.1): Speedup of Many-Cores Parallel Reactive Transport Simulations with Fast DHT-Lookups
Source: Copernicus journal article supplement (doi:10.5194/gmd-2021-162), 2021-07-14
Supplement: Supplementary file [file gmd-2021-162-RC2-supplement.pdf]

# Review of POET (v0.1): Speedup of Many-Cores Parallel Reactive Transport Simulations with Fast DHT-Lookups

The authors present a reactive transport simulator (POET) that makes use of HPC together with a Distributed Hash Table strategy to accelerate the simulations.

I find the paper well written, the literature review is extensive, the problem statements and results are clearly presented.

I just have minor change suggestions and recommendations to the authors.

- On subsection 2.4.3, (Approximated Lookup), the authors describe the approximate lookup strategy and give a complete remark about its advantages and disadvantages. The advantage is the fast retrieval of a previously computed equilibrium state for a given input vector. Because the given input vector is rounded to a certain number of digits (user-provided), the retrieved equilibrium state can be different than the actual fully computed one. If the equilibrium state is very sensitive with respect to some entry in the input vector, the resulting error can be substantial. I would like to point out that this disadvantage of their method can be eliminated (or greatly reduced) by adopting the first-order Taylor correction shown in Leal et al. (2020). This Taylor correction would also resolve the other disadvantage in their method in which the number of significant digits chosen for each input entry is problem-dependent. By using Reaktoro instead of PHREEQC, they would have access to the necessary derivatives to implement this correction. Their hash table would then not only save the input and output data, but also the sensitivity derivatives of the output vector with respect to the input vector. This reviewer is open to further discussion about this possibility with the authors and implementing existing PHREEQC features not yet available in Reaktoro.
- On Lines 73–80, I believe a more true account for the on-demand learning strategy presented in Leal et al. (2020) would be:

*Leal et al. (2020) proposes an on-demand learning strategy for speeding up the chemical calculations without any need for training in advance. Their algorithm, implemented in Reaktoro (Leal et al. 2015), tries first to predict the result of an equilibrium calculation using a first-order Taylor extrapolation from a previously fully computed equilibrium state. If the prediction is not accurate enough, a new full equilibrium calculation is performed and the sensitivity matrix of the newly computed equilibrium state is saved for future predictions (this is the on-demand learning step). They use an on-demand clustering strategy to organize the learned computations so that an efficient search operation can be performed to find the most suitable learned equilibrium computation for the predictions based on chemical characteristics of the equilibrium states. The on-demand clustering strategy was devised to eliminate the curse of dimensionality that existed in their previous version of the algorithm (Leal et al. 2017), which relied on a nearest neighbor search strategy (see Kyas et al., 2020).*

- Leal, A.M.M. (2015). Reaktoro: An open-source unified framework for modeling chemically reactive systems. [www.reaktoro.org](http://www.reaktoro.org)
  - Leal, A.M.M., Kulik, D.A., Saar, M.O. (2017). Ultra-Fast Reactive Transport Simulations When Chemical Reactions Meet Machine Learning: Chemical Equilibrium. <http://arxiv.org/abs/1708.04825>
- Is POET open-source? Is it available for download?
